# Supplementary material for: hSSB1 rapidly binds at the sites of DNA double-strand breaks and is required for the efficient recruitment of the MRN complex
Source: PubMed Central journal article supplement — Nucleic Acids Res. 2010 Nov 3;39(5):1692–702. doi: 10.1093/nar/gkq1098 (PMC3061066; doi:10.1093/nar/gkq1098), 2010-11-03
Supplement: supp_gkq1098_Supplimentary_material.pdf [file supp_gkq1098_Supplimentary_material.pdf]

Supplementary Figure 1

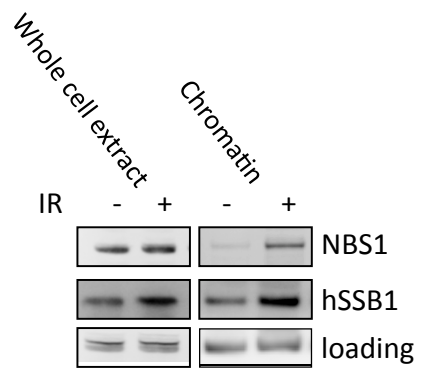

Supplementary Figure 2

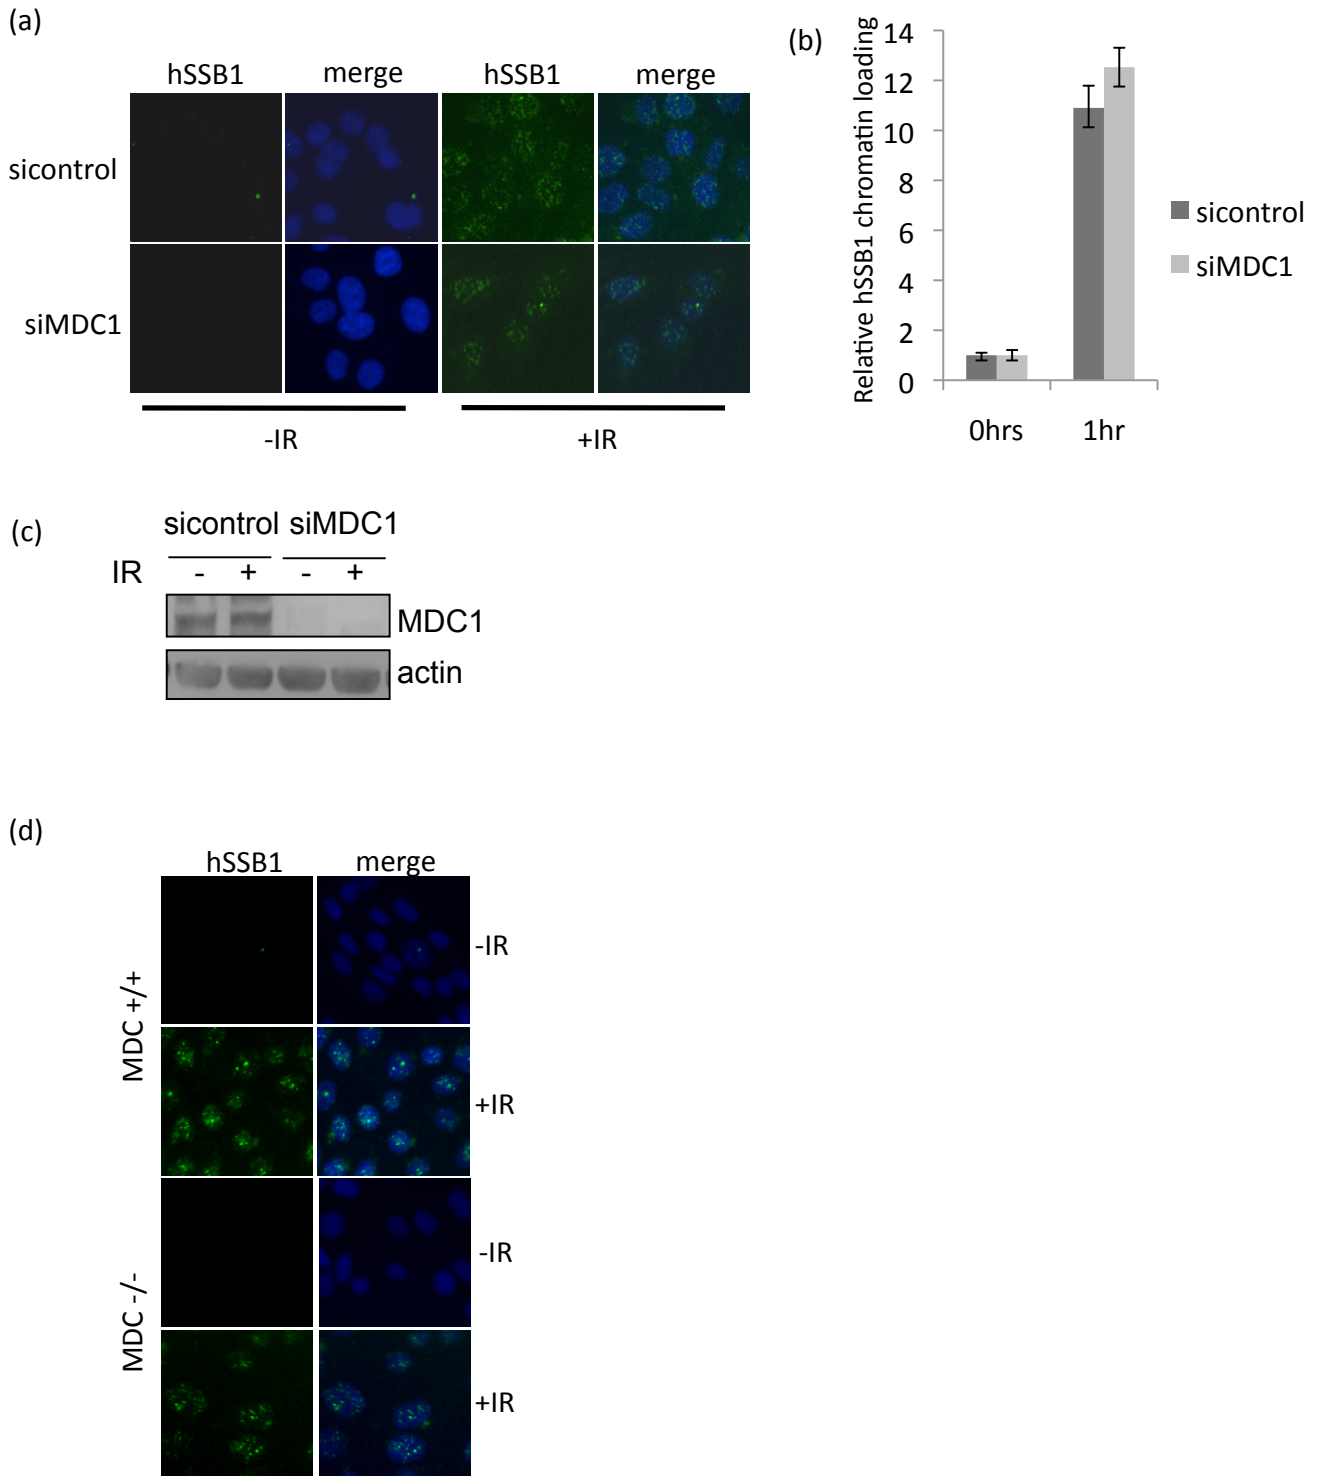

Supplementary Figure 3

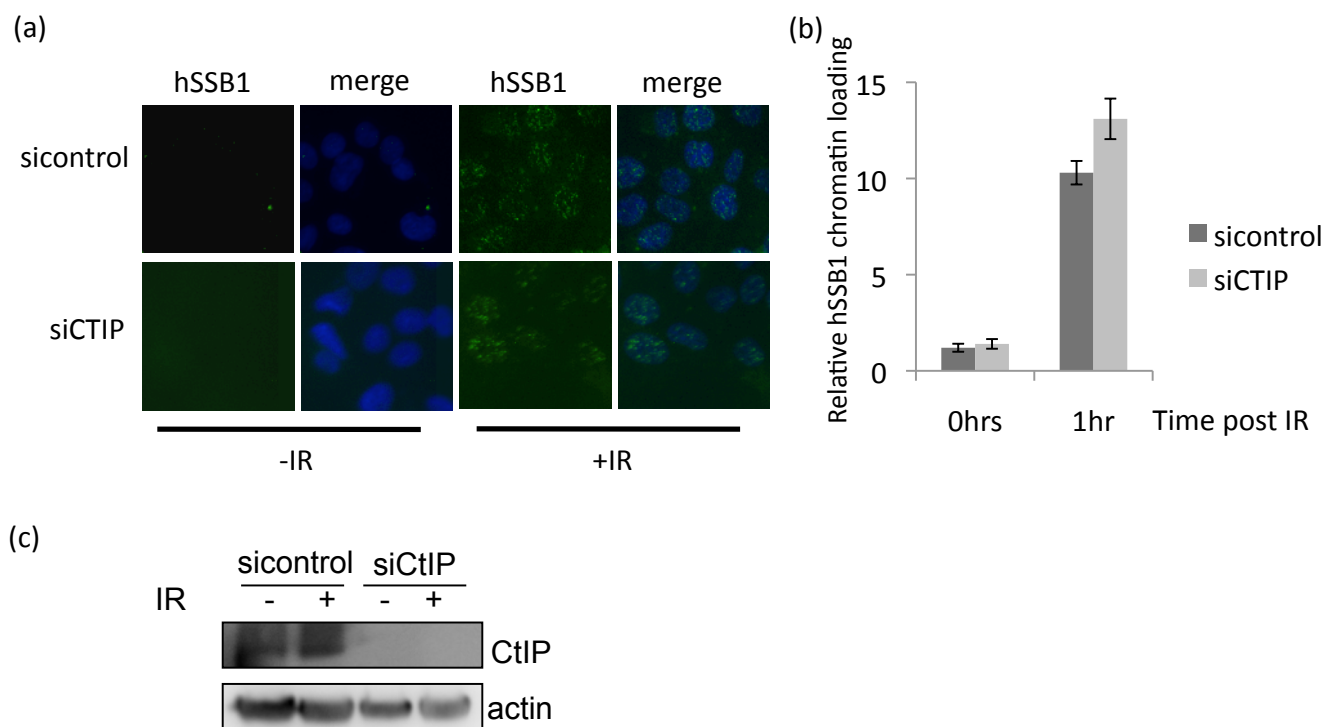

Supplementary Figure 4

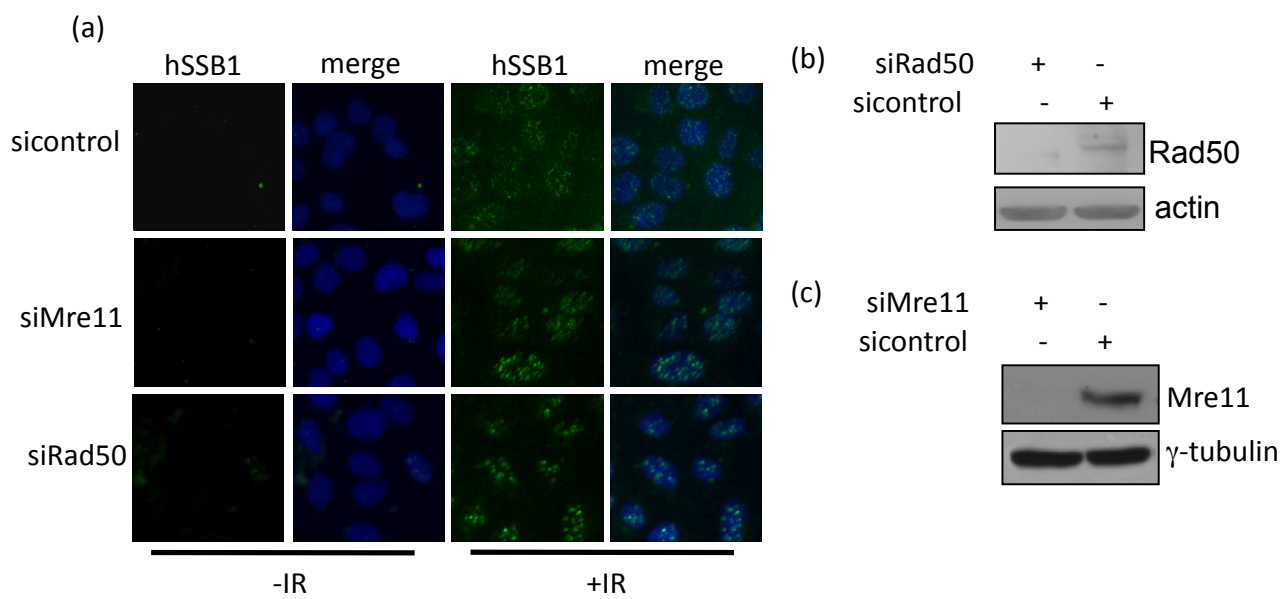

Supplementary Figure 5

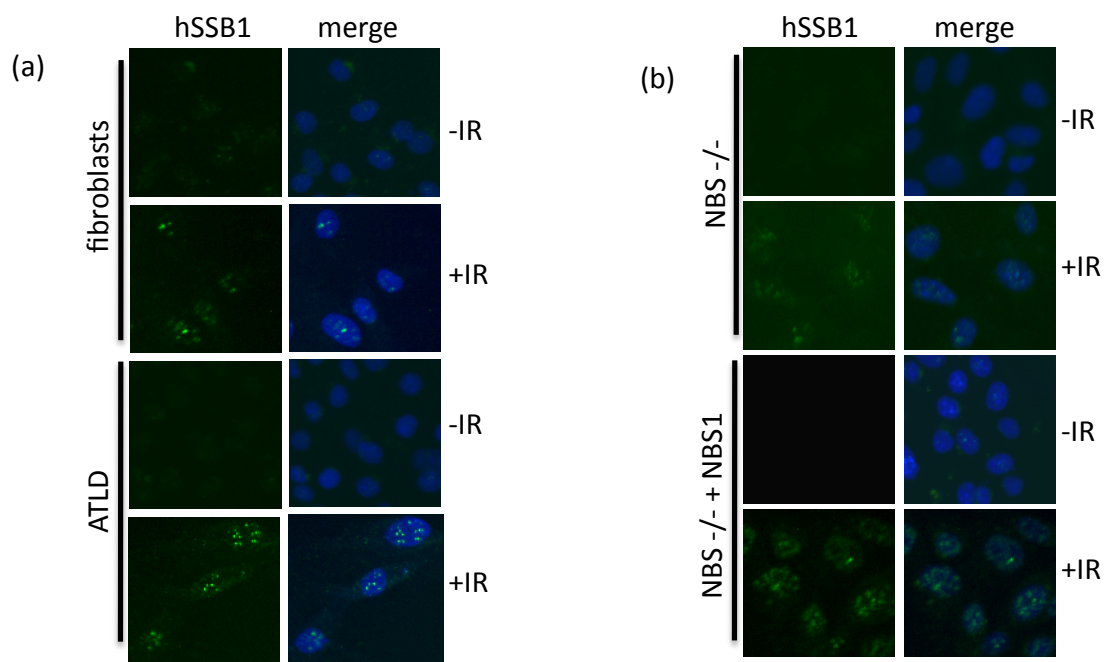

Supplementary Figure 6

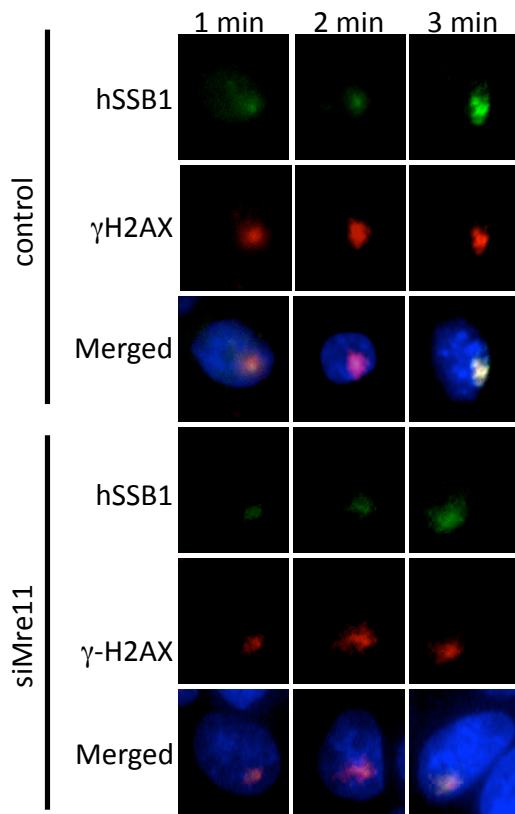

Supplementary Figure 7

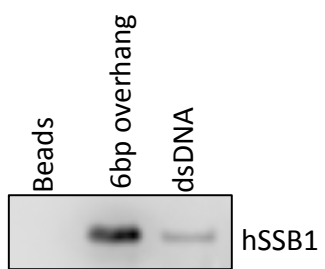

Supplementary Figure 8

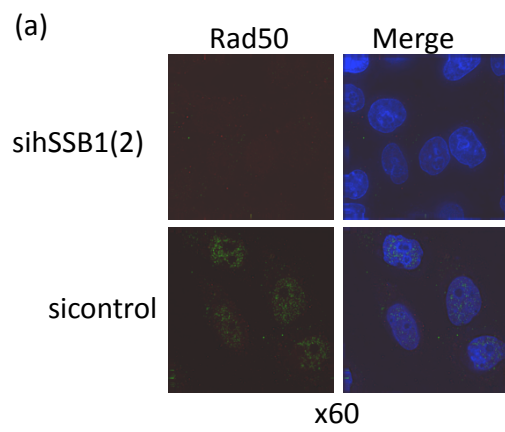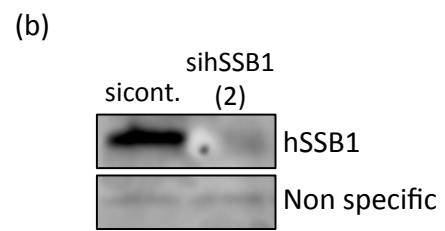



## **SUPPLEMENTARY FIGURE LEGENDS**

**Supplementary Figure 1 Chromatin fractionation.** hSSB1 and NBS1 loading onto chromatin following IR treatment, of U2OS cells.

**Supplementary Figure 2. MDC1 is not required for hSSB1 foci formation or chromatin loading.** (a) U2OS cells depleted of MDC1 by siRNA (48 hours) and stained for hSSB1 as indicated. (b) Quantification of chromatin loading using in-nuclear-western. (c) Immunoblot demonstrating effective depletion of MDC1 with target siRNA. (d) MDC1 deficient and wild type fibroblasts immuno-stained for hSSB1 as indicated. All images were taken on an x20 objective using an In-cell-2000 microscope (GE). +IR cells were irradiated with 2Gy IR and allowed to recover for 30 minutes. Error bars were calculated from the standard deviation.

**Supplementary Figure 3. CtIP is not required for hSSB1 foci formation or chromatin loading.** (a) U2OS cells depleted of CtIP by siRNA (48 hours) and stained for hSSB1 as indicated. (b) Quantification of chromatin loading using in-nuclear-western. (c) Immunoblot demonstrating effective depletion of MDC1 with target siRNA. All images were taken on an x20 objective using an In-cell-2000 microscope (GE). +IR cells were irradiated with 2Gy IR and allowed to recover for 30 minutes. Error bars were calculated from the standard deviation.

**Supplementary Figure 4. MRN is not required for IR induced hSSB1 foci formation or chromatin loading.** (a) U2OS cells were depleted of Mre11 or Rad50 by specific siRNA as indicated. Cells were immuno-stained 48hrs after for hSSB1 as indicated. +IR cells were then irradiated with 2Gy IR and allowed to recover for 30 minutes. All images were taken on an x20 objective using an In-cell-2000 microscope (GE). (b,c) Immunoblots demonstrating effective depletion of Rad50 and Mre11 by siRNA.

**Supplementary Figure 5. MRN is not required for IR induced hSSB1 foci formation.** (a,b) Deficiency of NBS1 and Mre11 does not impair hSSB1 foci formation. NBS1-deficient fibroblasts (ILB1) transfected with retroviral vector alone or full-length NBS1 cDNA and Mre11-deficient (ATLD) and control fibroblasts, were immunostained with anti-hSSB1 antibody 30 min after irradiation (6 Gy) or mock treated. Cells were treated with IR and allowed to recover for 1 hr prior to NP40 extraction, fixation and staining. All images were taken on an x20 objective using an In-cell-2000 microscope (GE).

**Supplementary Figure 6. Mre11 is not required for the recruitment of hSSB1 to soft x-ray induced DSBs.** MCF7 cells were treated with Mre11 specific siRNA 48 hrs prior to exposure to soft x-rays. Cells were fixed at indicated time points and immunostained as labeled.

**Supplementary Figure 7. hSSB1 can bind to a 6bp DNA overhang.** Immunoblot of a DNA pulldown assay demonstrating hSSB1 can bind to a 6bp overhang or a 34bp duplex DNA substrate.

**Supplementary Figure 8. Defective IR-induced Rad50 foci formation in hSSB1- depleted cells.** (a) MCF7 cells were depleted of hSSB1 using a specific siRNA (sihSSB1(2)). Rad50 foci formation was severely impaired. Images were captured on a Deltavision PDV, with a x60 objective. (b) Immunoblot showing levels of hSSB1 depletion using sihSSB1(2).
